# Supplementary material for: Newborn Cry Acoustics in the Assessment of Neonatal Opioid Withdrawal Syndrome Using Machine Learning
Source: PubMed Central journal article supplement (PMC9614579; doi:10.1001/jamanetworkopen.2022.38783), 2022-10-27

## Supplemental Online Content

Manigault AW, Sheinkopf SJ, Silverman HF, Lester BM. Newborn cry acoustics in the assessment of neonatal opioid withdrawal syndrome using machine learning. *JAMA Netw Open*. 2022;5(10):e2238783. doi:10.1001/jamanetworkopen.2022.38783

### **eFigure.** Recruitment Flow Diagram

This supplemental material has been provided by the authors to give readers additional information about their work.

**eFigure.** Recruitment Flow Diagram

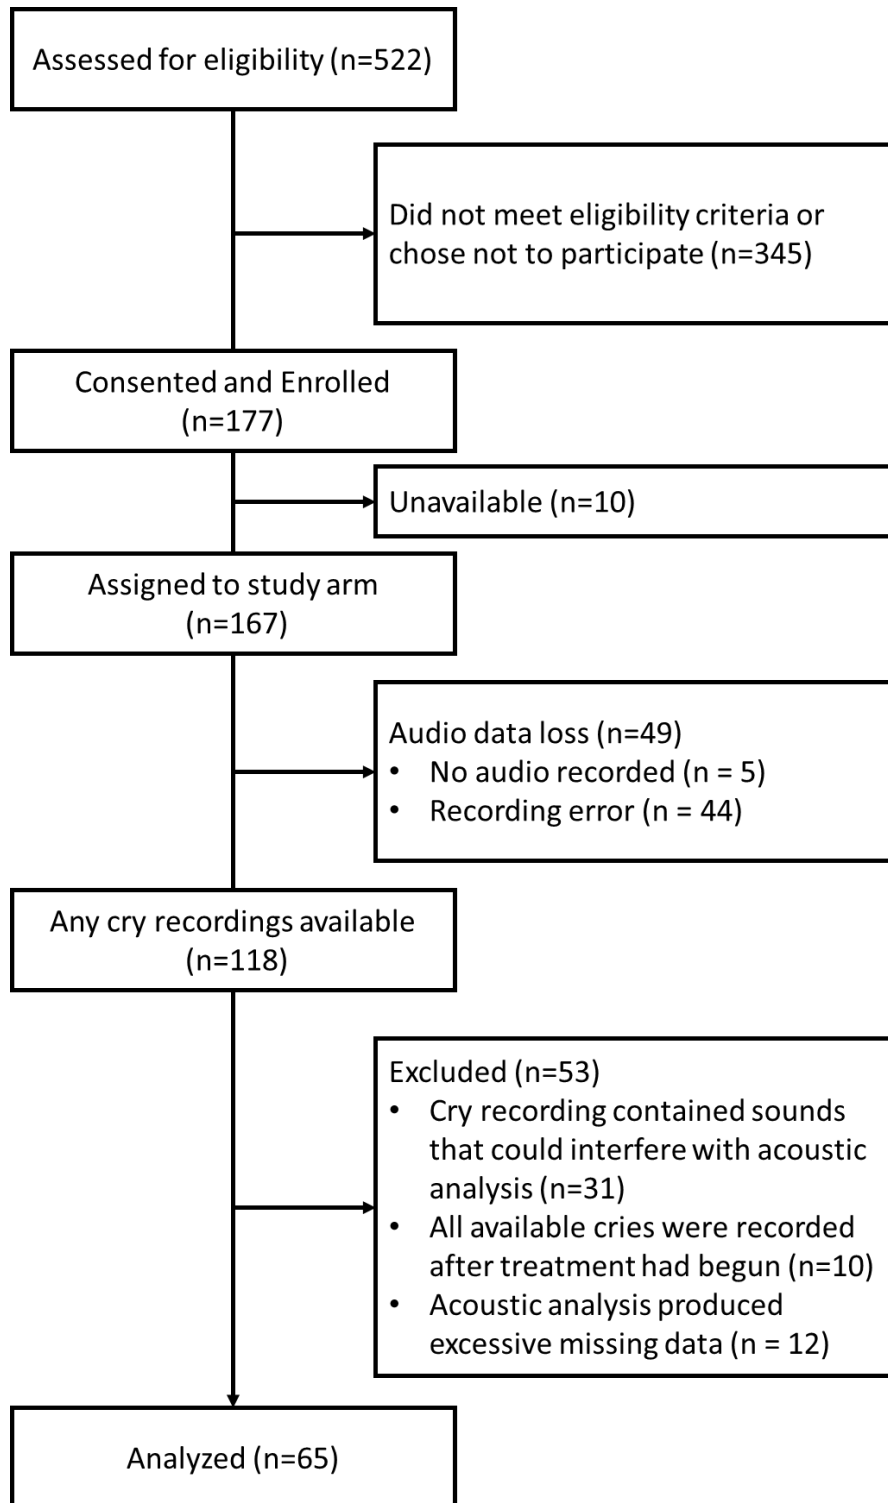

Supplement: jamanetwopen-e2238783-s001.pdf [file jamanetwopen-e2238783-s001.pdf]
